# Supplementary material
Source: bioRxiv or medRxiv preprint supplement (https://www.biorxiv.org/highwire/filestream/84831/field_highwire_adjunct_files/0/275040-1.pdf)

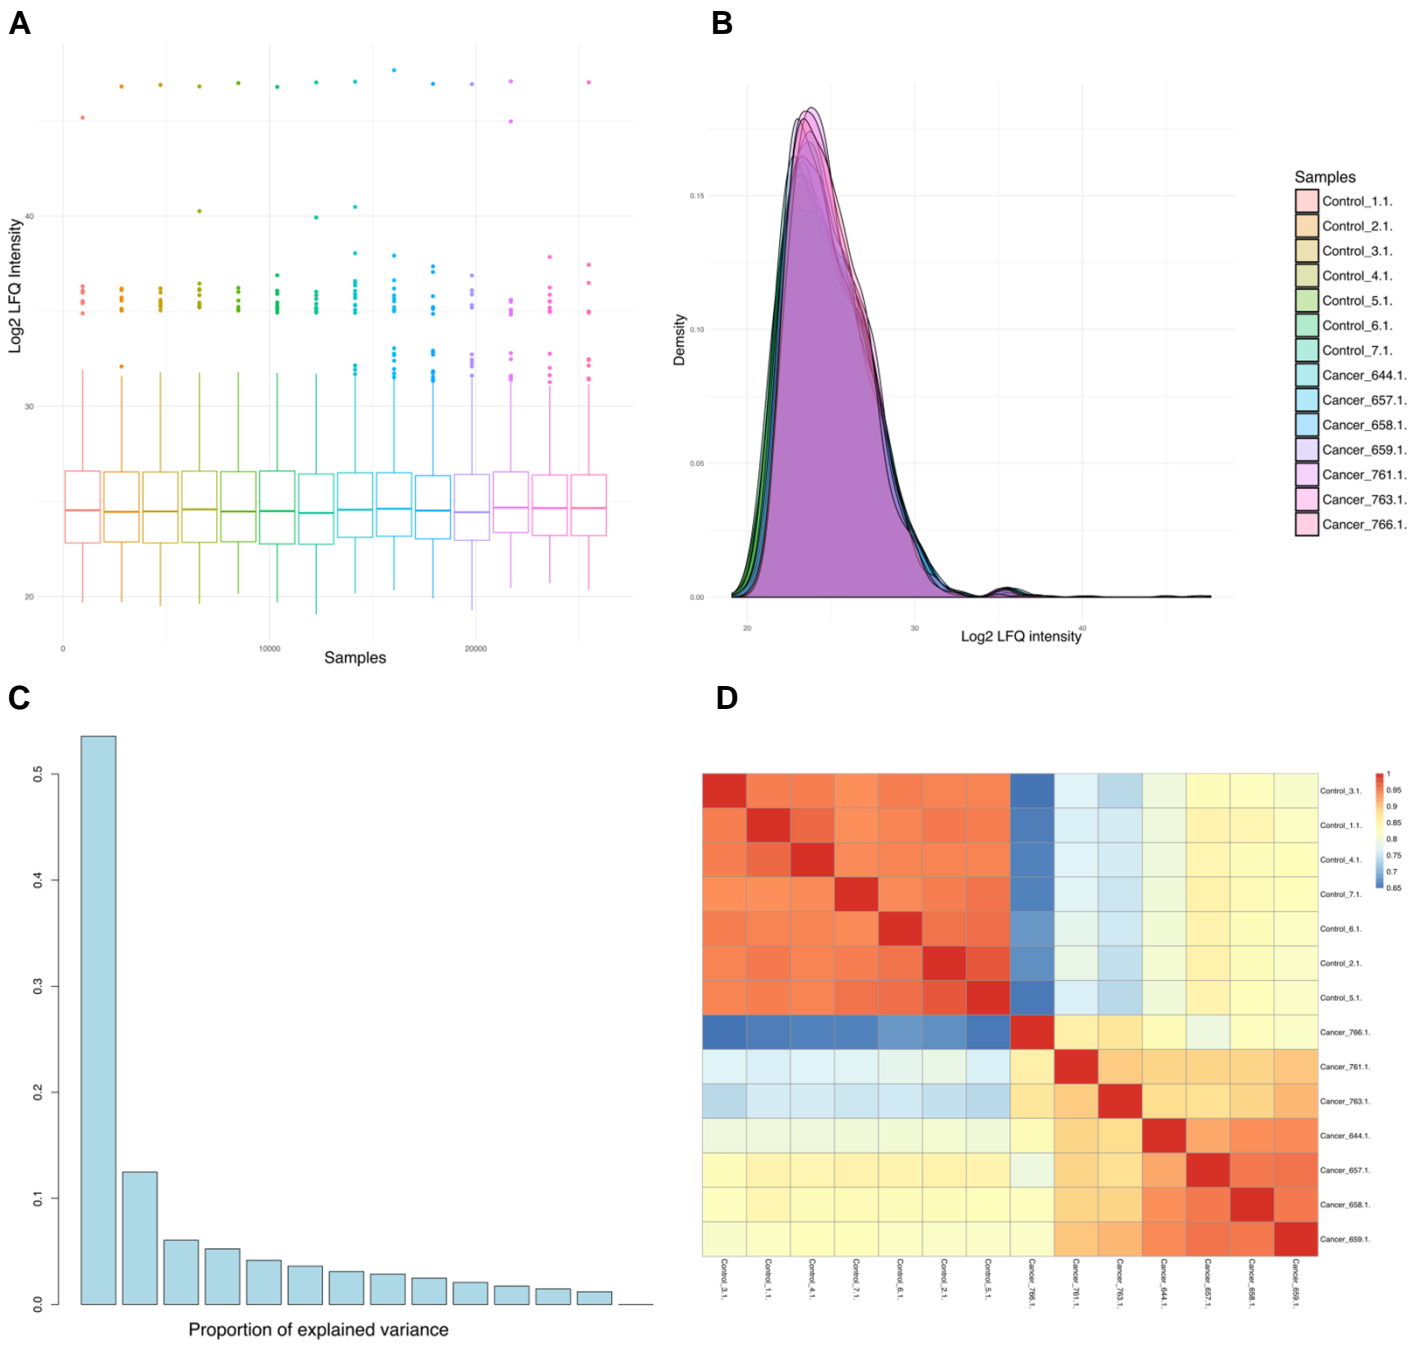

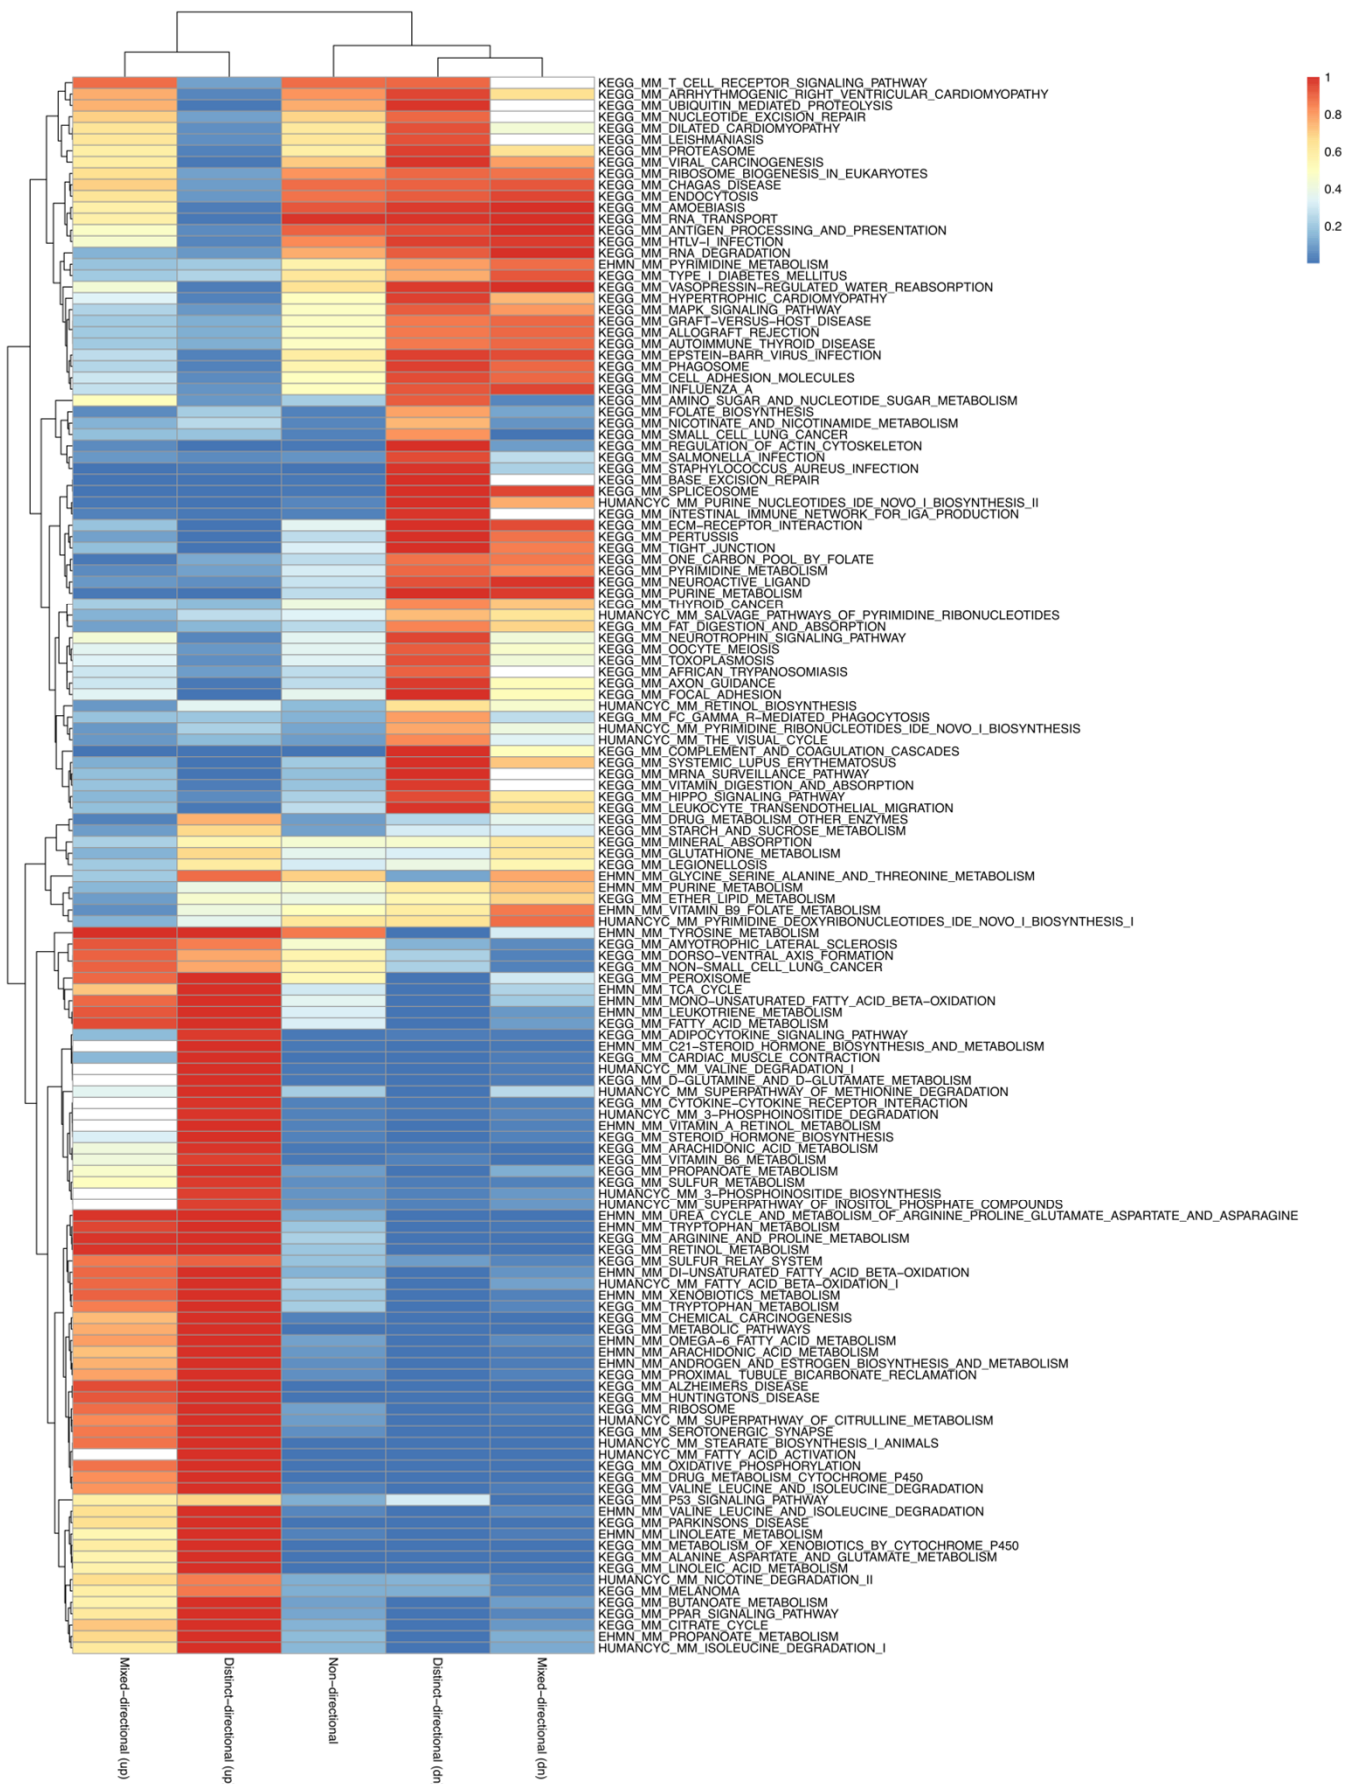

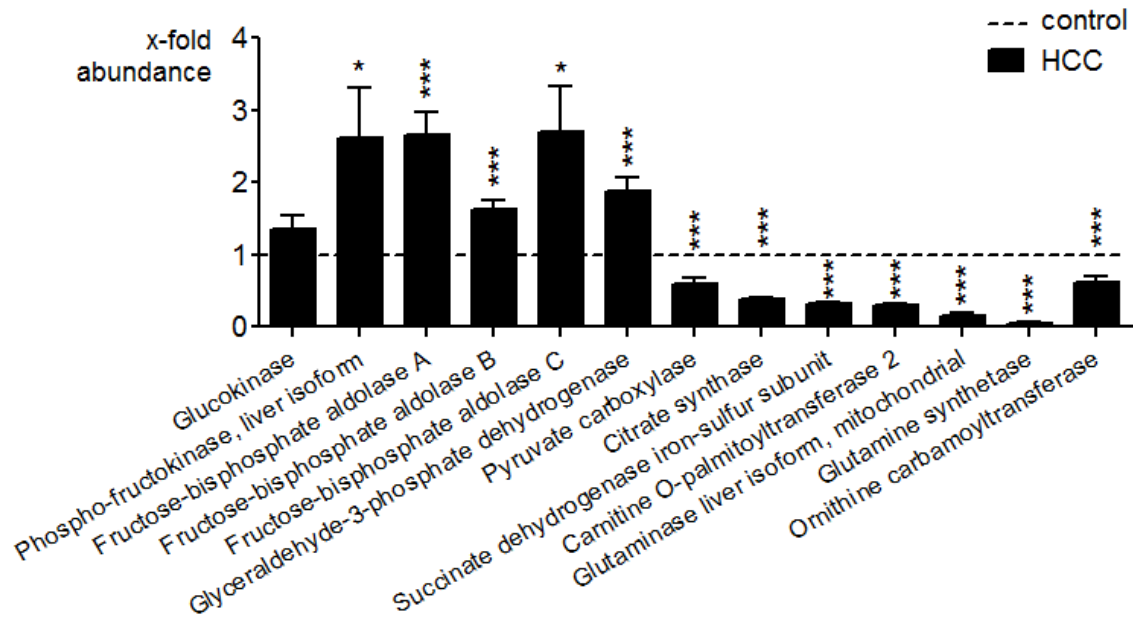

**A**

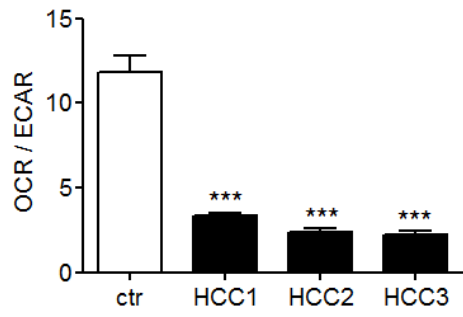

**B**

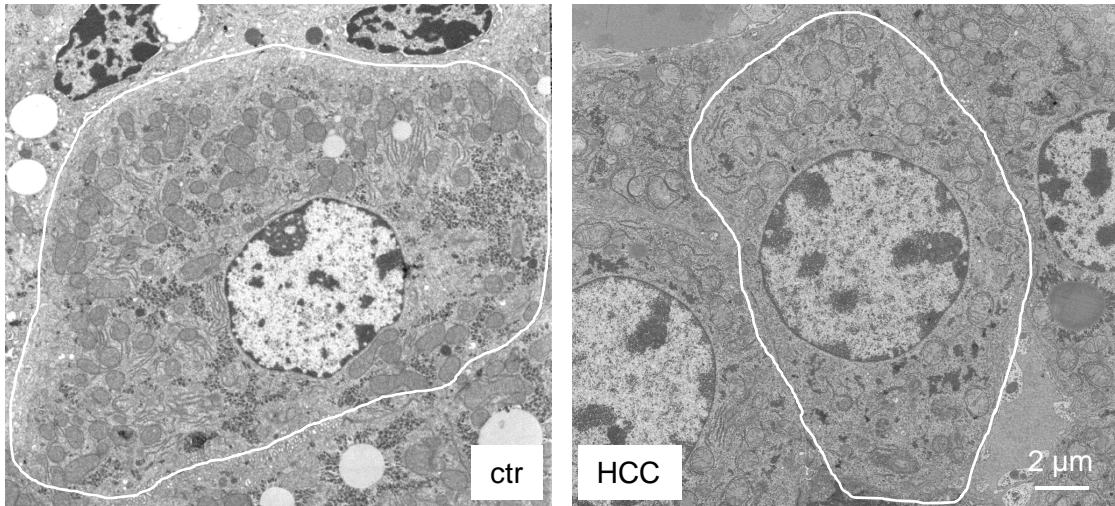

Supplement: Supplementary file [file 275040-1.pdf]
